# Supplementary material
Source: PubMed Central journal article supplement (PMC8165509)
Supplement: 10157_2021_2082_MOESM1_ESM.pdf [file 10157_2021_2082_MOESM1_ESM.pdf]

## 【腎臓病患者の COVID-19 予防・診療体制調査】

【1】貴施設が当てはまるものをお選びください。

- 日本透析医会会員施設
- 日本透析医学会会員施設
- 日本腎臓学会認定教育施設

【2】貴施設は感染症指定病院ですか。

- はい
- いいえ<施設規模について>

腎臓病診療に携わる以下のスタッフ数を教えてください。

【3】常勤医師

(                      ) 人

【4】貴科では週に約何人の外来診療を行っていますか。おおまかで構いません。

(                      ) 人

【5】貴科の平均入院患者数を教えてください。おおまかで構いません。

(                      ) 人

<腎臓内科一般診療における感染予防対策について>

|     | 感染予防対策                                                  | はい                       | いいえ                      |
|-----|---------------------------------------------------------|--------------------------|--------------------------|
| 【6】 | スタッフは、一般診療時常に誰に対してもゴーグルあるいはフェイスシールドを装着している              | <input type="checkbox"/> | <input type="checkbox"/> |
| 【7】 | スタッフは、一般診療時常に誰に対してもディスポーザブルの非透水性ガウンまたはプラスチックエプロンを装着している | <input type="checkbox"/> | <input type="checkbox"/> |
| 【8】 | 侵襲的手技を行うスタッフは、ゴーグルあるいはフェイスシールドを装着している                   | <input type="checkbox"/> | <input type="checkbox"/> |
| 【9】 | 侵襲的手技を行うスタッフは、ディスポーザブルの非透水性ガウンまたはプラスチックエプロンを装着している      | <input type="checkbox"/> | <input type="checkbox"/> |

|      |                                                     |   |   |
|------|-----------------------------------------------------|---|---|
| 【10】 | 患者が感染症が疑われる状態にないかどうか、体温測定・症状の有無の確認などを用いて、来院時に確認している | □ | □ |
|------|-----------------------------------------------------|---|---|

<COVID-19 による腎臓内科一般診療への影響について>

【11】 腎臓内科一般診療において外来患者数の変化はありましたか。

- はい
- いいえ

【12】 はいの場合、変化はだいたいどれくらいでしたか。

※-1～+1 割は、変化なしに相当するとして選択肢として設定していません。

- 5 割以上
- 5～-3 割
- 3～-1 割
- +1～+3 割
- +3～+5 割
- +5 割以上

|      |                                   | はい | いいえ |
|------|-----------------------------------|----|-----|
| 【13】 | COVID-19 流行に伴い、通常よりも通院間隔を長くしましたか。 | □  | □   |
| 【14】 | オンライン診療・電話診療は導入されましたか。            | □  | □   |

【15】 通院間隔を長くするあるいはオンライン診療にしたことで、診療上明らかな不都合が生じたケースはありましたか。

- はい
- いいえ

【16】 はいの場合、生じた不都合の内容につき可能な範囲内で具体的にご記載ください。

（

COVID-19 予防・診療体制調査（腎臓内科向け）

【17】 貴施設には入院病棟はありますか。

- はい
- いいえ

【18】 貴施設の全入院病床数（腎臓内科に限らない）を教えてください。

(                      ) 床

【19】 貴施設に COVID-19 対策病棟がございましたらその病床数を教えてください。

(                      ) 床

回答時点で行われている感染予防対策に☑をつけてください。

|      | 感染予防対策              | PCR 検査                   | 抗原検査                     | 胸部 CT                    | いずれも<br>行わない             |
|------|---------------------|--------------------------|--------------------------|--------------------------|--------------------------|
| 【20】 | 緊急入院の症例は<br>右の検査を行う | <input type="checkbox"/> | <input type="checkbox"/> | <input type="checkbox"/> | <input type="checkbox"/> |
| 【21】 | 定時入院の症例は<br>右の検査を行う | <input type="checkbox"/> | <input type="checkbox"/> | <input type="checkbox"/> | <input type="checkbox"/> |

【22】 腎臓内科一般診療において入院患者数の変化はありましたか。

- はい
- いいえ

【23】 はいの場合、変化はだいたいどれくらいでしたか。

※-1~+1 割は、変化なしに相当するとして選択肢として設定していません。

- 5 割以上
- 5~-3 割
- 3~-1 割
- +1~+3 割
- +3~+5 割
- +5 割以上

【24】 COVID-19 に罹患した CKD 症例の診療経験はありますか。

- はい
- いいえ

【25】 はいの場合、診療経験は何例ありますか。

( ) 例

【26】 貴施設で診療した COVID-19 に罹患した CKD 症例について、何例に以下の治療を行いましたか。

|                         |     |   |
|-------------------------|-----|---|
| 酸素投与                    | ( ) | 例 |
| 人工呼吸器管理                 | ( ) | 例 |
| ECMO                    | ( ) | 例 |
| CHDF                    | ( ) | 例 |
| 一次的な血液透析                | ( ) | 例 |
| COVID-19 感染を契機とした維持透析導入 | ( ) | 例 |
| PMX                     | ( ) | 例 |

【27】 COVID-19 確定後に他院へ転院した場合、どのような病院に転院しましたか。

- 転院を要する症例の診療経験なし
- 感染症指定医療機関
- 大学病院
- 一般病院

【28】 COVID-19 に罹患した CKD 症例の転院が必要な際に、受け入れ先の調整に難渋しましたか。

- はい
- いいえ

【29】 COVID-19 に罹患した CKD 症例について、以下の転帰を辿った症例数を記載してください。

|                   |     |   |
|-------------------|-----|---|
| 軽快                | ( ) | 例 |
| 重症合併症（脳梗塞、足壊疽など）  | ( ) | 例 |
| COVID-19 に関連する死亡  | ( ) | 例 |
| COVID-19 に関連しない死亡 | ( ) | 例 |

【30】 透析導入を契機に COVID-19 が判明した症例はありましたか。

- はい
- いいえ

COVID-19 予防・診療体制調査（腎臓内科向け）

【31】腎臓内科に関連して、COVID-19 の院内感染（院内におけるスタッフあるいは患者の水平感染）は起こりましたか。

- はい
- いいえ

【32】起きた場合、計何人が感染しましたか。

(                      ) 人

【33】そのうち、スタッフは何人ですか。

(                      ) 人

【34】COVID-19 予防対策、診療体制において、工夫した点、困った点、その他お気づきの点があれば、ぜひ教えてください。
