# Supplementary material
Source: PubMed Central journal article supplement (PMC8165509)
Supplement: 10157_2021_2082_MOESM2_ESM.pdf [file 10157_2021_2082_MOESM2_ESM.pdf]

**[Survey of the coronavirus disease 2019 (COVID-19) prevention and treatment systems for patients with kidney disease]**

(English translation)

**Questions:**

[1] Please select each option that applies to your facility.

- Facility is a member of the Japanese Association of Dialysis Physicians (JADP)
- Facility is a member of the Japanese Society of Dialysis Therapy (JSDT)
- Certified Japanese Society of Nephrology (JSN) educational facility

[2] Is your facility a designated hospital for the treatment of infectious diseases?

- Yes
- No

**<Scale of the facility>**

How many of the following staff members are involved in the nephrology department?

[3] Full-time doctors

( ) persons

[4] How many outpatients does your department treat each week? Please provide a rough estimate.

( ) persons

[5] What is the average number of inpatients in your department? Please provide a rough estimate.

( ) persons

**<Infection prevention measures in general nephrology practice>**

| No.  | Infection prevention measures                                                                                                                     | Yes                      | No                       |
|------|---------------------------------------------------------------------------------------------------------------------------------------------------|--------------------------|--------------------------|
| [6]  | All medical staff wear goggles or face shields at all times during general practice.                                                              | <input type="checkbox"/> | <input type="checkbox"/> |
| [7]  | All medical staff wear disposable, non-permeable gowns or plastic aprons at all times during general practice.                                    | <input type="checkbox"/> | <input type="checkbox"/> |
| [8]  | Medical staffs who are performing invasive procedures wear goggles or face shields.                                                               | <input type="checkbox"/> | <input type="checkbox"/> |
| [9]  | Medical staffs who are performing invasive procedures wear disposable, non-permeable gowns or plastic aprons.                                     | <input type="checkbox"/> | <input type="checkbox"/> |
| [10] | Upon visiting the facility, all patients are screened for infectious diseases using temperature measurements and interviews about their symptoms. | <input type="checkbox"/> | <input type="checkbox"/> |

< Impact of COVID-19 on general nephrology practice >

[11] Have there been any changes in the number of outpatients in the general nephrology department?

- Yes
- No

[12] If yes, approximately how much has it changed?

\* -10% to +10% is equivalent to no change and was not provided as a choice.

- 50% or less
- 50% to -30%
- 30% to -10%
- 10% to 30%
- 30% to 50%
- 50% or more

| No.  | Questions                                                                                                              | Yes                      | No                       |
|------|------------------------------------------------------------------------------------------------------------------------|--------------------------|--------------------------|
| [13] | Did you increase the duration of the intervals between outpatient visits more than usual due to the COVID-19 pandemic? | <input type="checkbox"/> | <input type="checkbox"/> |
| [14] | Have you introduced online or telephonic medical care?                                                                 | <input type="checkbox"/> | <input type="checkbox"/> |

[15] Have there been any incidents where the lengthening of the intervals between outpatient visits and/or introduction of online/telephonic medical care caused obvious inconveniences?

- Yes
- No

[16] If yes, please describe the inconvenience, in detail, to the greatest extent possible.

( )

[17] Is there an inpatient ward at your facility?

- Yes
- No

[18] What is the total number of inpatient beds (not limited to nephrology) at your facility?

( ) beds

[19] If there is an inpatient ward for COVID-19 at your facility, please provide the number of beds in the ward.

( ) beds

Please select the infection prevention measures that your facility is currently taking

| No.  |                           | Polymerase chain reaction test | Antigen test             | Chest computed tomography | None of these            |
|------|---------------------------|--------------------------------|--------------------------|---------------------------|--------------------------|
| [20] | Emergency admission cases | <input type="checkbox"/>       | <input type="checkbox"/> | <input type="checkbox"/>  | <input type="checkbox"/> |
| [21] | Scheduled admission cases | <input type="checkbox"/>       | <input type="checkbox"/> | <input type="checkbox"/>  | <input type="checkbox"/> |

[22] Have there been any changes in the number of hospitalized patients in the general nephrology department?

Yes

No

[23] If yes, please provide an approximation of this change.

\* -10% to +10% is equivalent to no change and is not provided as a choice.

-50% or less

-50% to -30%

-30% to -10%

10% to 30%

30% to 50%

50% or more

[24] Do you have any experience with treating chronic kidney disease (CKD) patients with COVID-19?

Yes

No

[25] If yes, how many cases have you treated?

( ) cases

[26] How many of the CKD patients with COVID-19 who were treated at your facility received the following treatments?

Oxygen administration

( ) cases

|                                                                     |           |
|---------------------------------------------------------------------|-----------|
| Ventilatory management                                              | ( ) cases |
| Extracorporeal membrane oxygenation                                 | ( ) cases |
| Continuous hemodiafiltration                                        | ( ) cases |
| Transient hemodialysis                                              | ( ) cases |
| Introduction of maintenance dialysis that was triggered by COVID-19 | ( ) cases |
| Polymyxin B-immobilized fiber column direct hemoperfusion           | ( ) cases |

[27] If you had experiences that involved transferring COVID-19 positive cases to another hospital, what hospital did you transfer them to?

- No experience in treating COVID-19 cases that required hospital transfers
- Designated hospital for the management of infectious diseases
- University hospital
- General hospital

[28] When a CKD patient with COVID-19 needed to be transferred to a hospital, did you experience difficulties with coordinating a hospital that would accept them?

- Yes
- No

[29] With respect to the patients with CKD who were affected by COVID-19, please indicate the number of cases with the following outcomes:

|                                                                       |           |
|-----------------------------------------------------------------------|-----------|
| Remission                                                             | ( ) cases |
| Severe complications (e.g., cerebral infarction, foot gangrene, etc.) | ( ) cases |
| Death due to COVID-19                                                 | ( ) cases |
| Death due to another cause (not COVID-19)                             | ( ) cases |

[30] Were there any cases in which COVID-19 was diagnosed immediately after the introduction of dialysis?

- Yes
- No

[31] Were there any cases of nosocomial COVID-19 transmission (horizontal COVID-19 transmission among staff members or patients within the facility) that were related to the nephrology unit?

- Yes
- No

[32] If this happened, how many people were infected in total?

(    ) persons

[33] How many of the infected people were staff members?

(    ) persons

[34] Please tell us about any innovations, difficulties, or other points you have noticed with respect to your facility's COVID-19 prevention measures and medical treatment systems.

(                    )
